# Supplementary material for: The Bilirubin Albumin Ratio in the Management of Hyperbilirubinemia in Preterm Infants to Improve Neurodevelopmental Outcome: A Randomized Controlled Trial – BARTrial
Source: PubMed Central journal article supplement (PMC4057208; doi:10.1371/journal.pone.0099466), 2014-06-13
Supplement: pone.0099466.s001.pdf [file pone.0099466.s001.pdf]

# **BARTrial bilirubin normograms for phototherapy and exchange transfusion**

## **Total Serum Bilirubin (TSB) and for Bilirubin:Albumin ratio (BA)**

### **Birthweight categories**

|             |                |                       |
|-------------|----------------|-----------------------|
| <1000 g     | BA ratio group | TSB and BA normograms |
| <1000 g     | TSB group      | TSB normogram         |
| 1000-1250 g | BA ratio group | TSB and BA normograms |
| 1000-1250 g | TSB group      | TSB normogram         |
| 1250-1500 g | BA ratio group | TSB and BA normograms |
| 1250-1500 g | TSB group      | TSB normogram         |
| 1500-2000 g | BA ratio group | TSB and BA normograms |
| 1500-2000 g | TSB group      | TSB normogram         |
| >2000 g     | BA ratio group | TSB and BA normograms |
| >2000 g     | TSB group      | TSB normogram         |

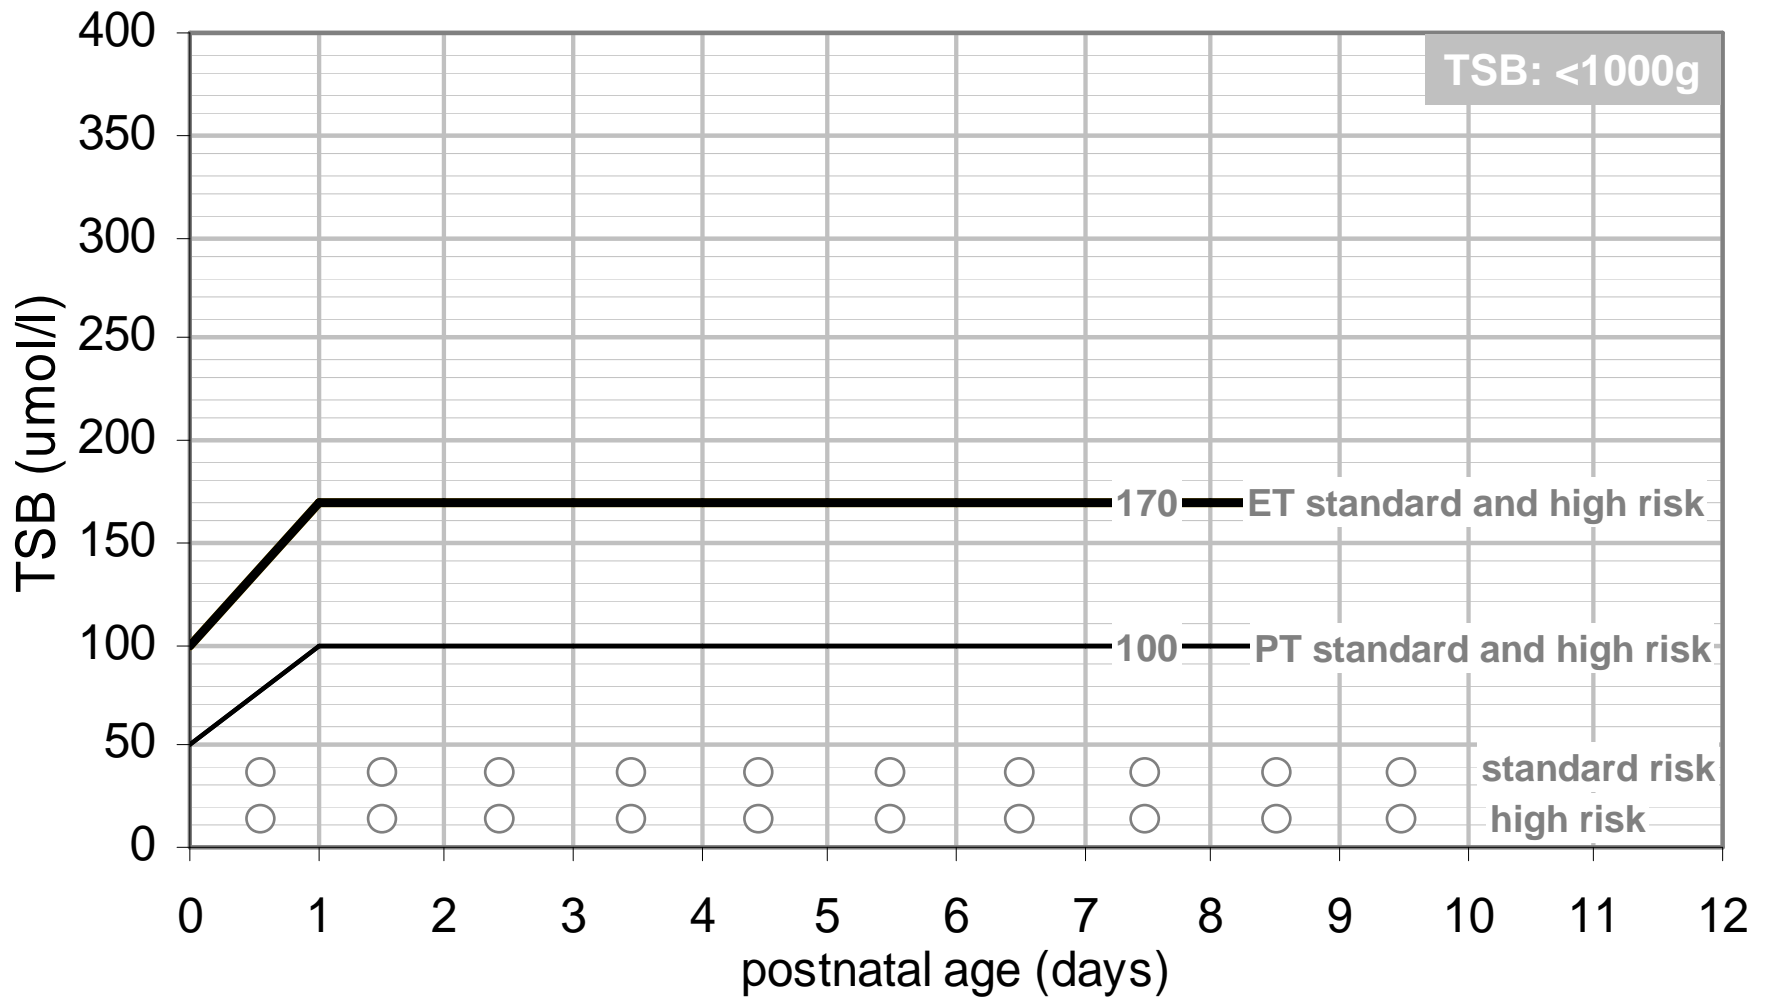

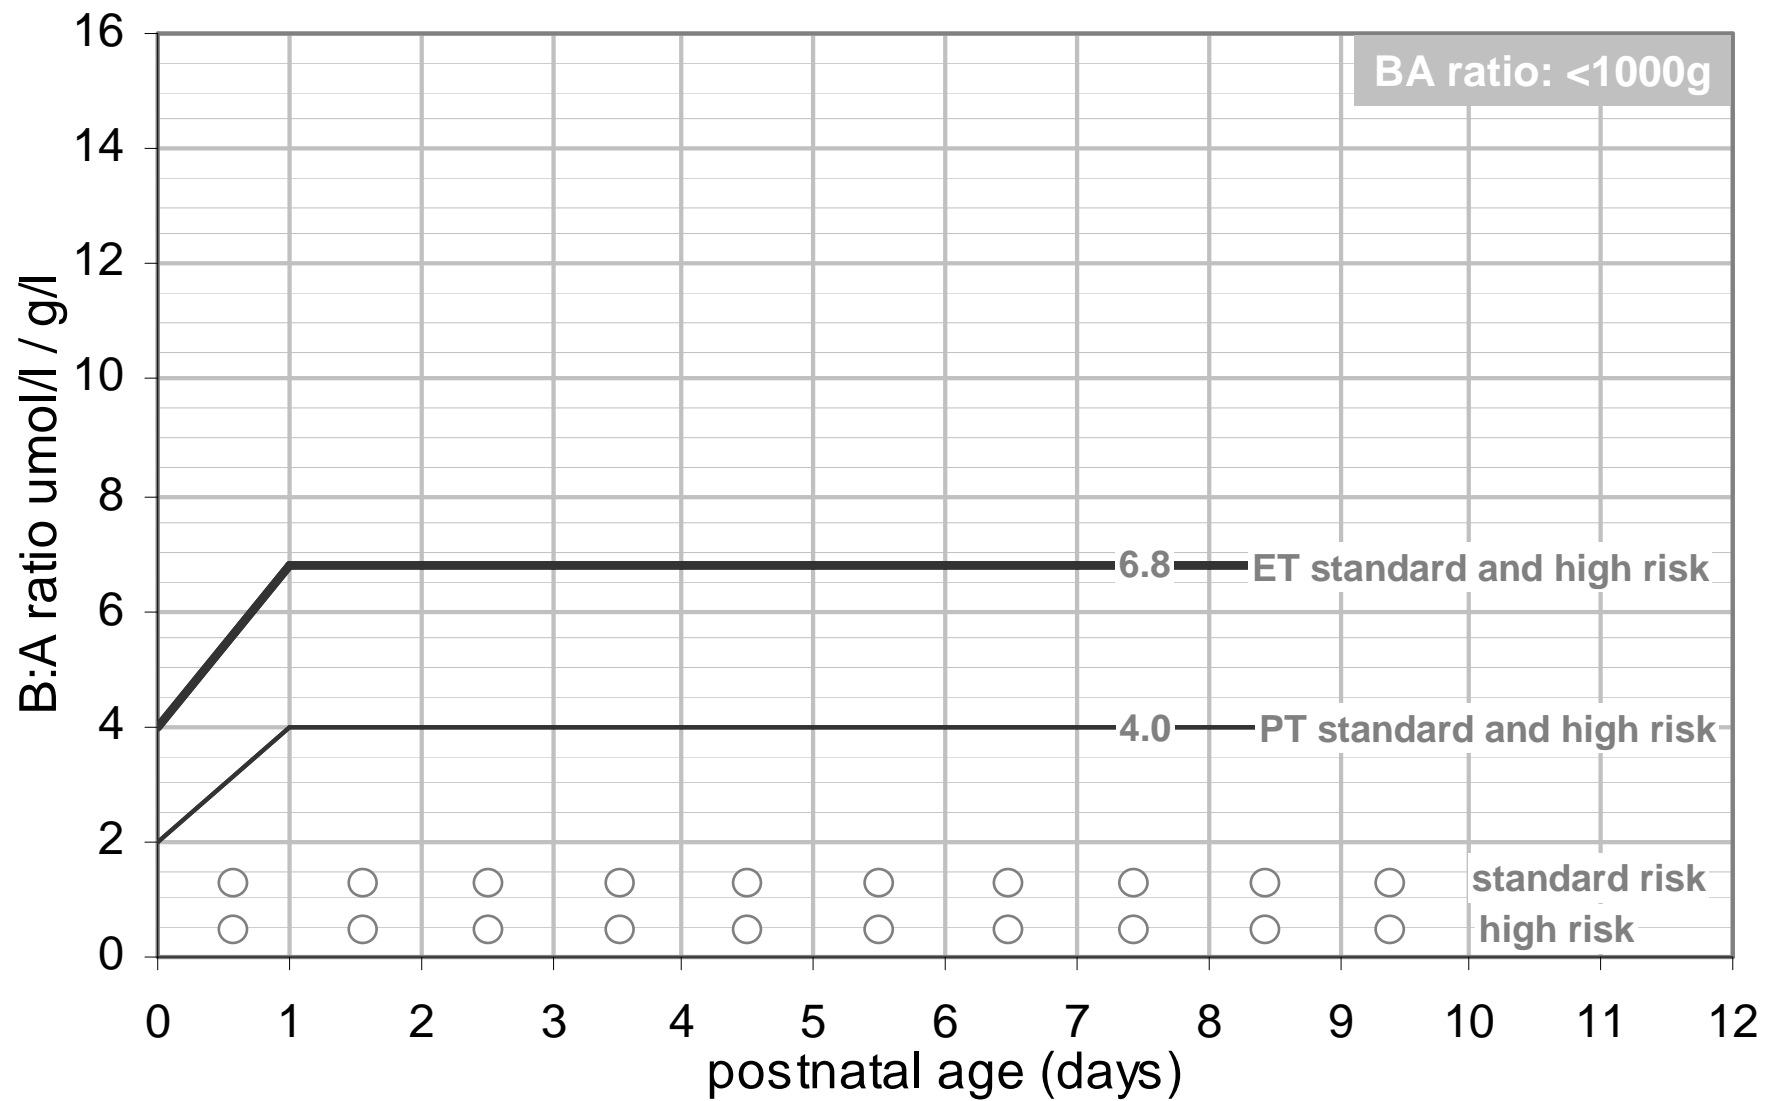

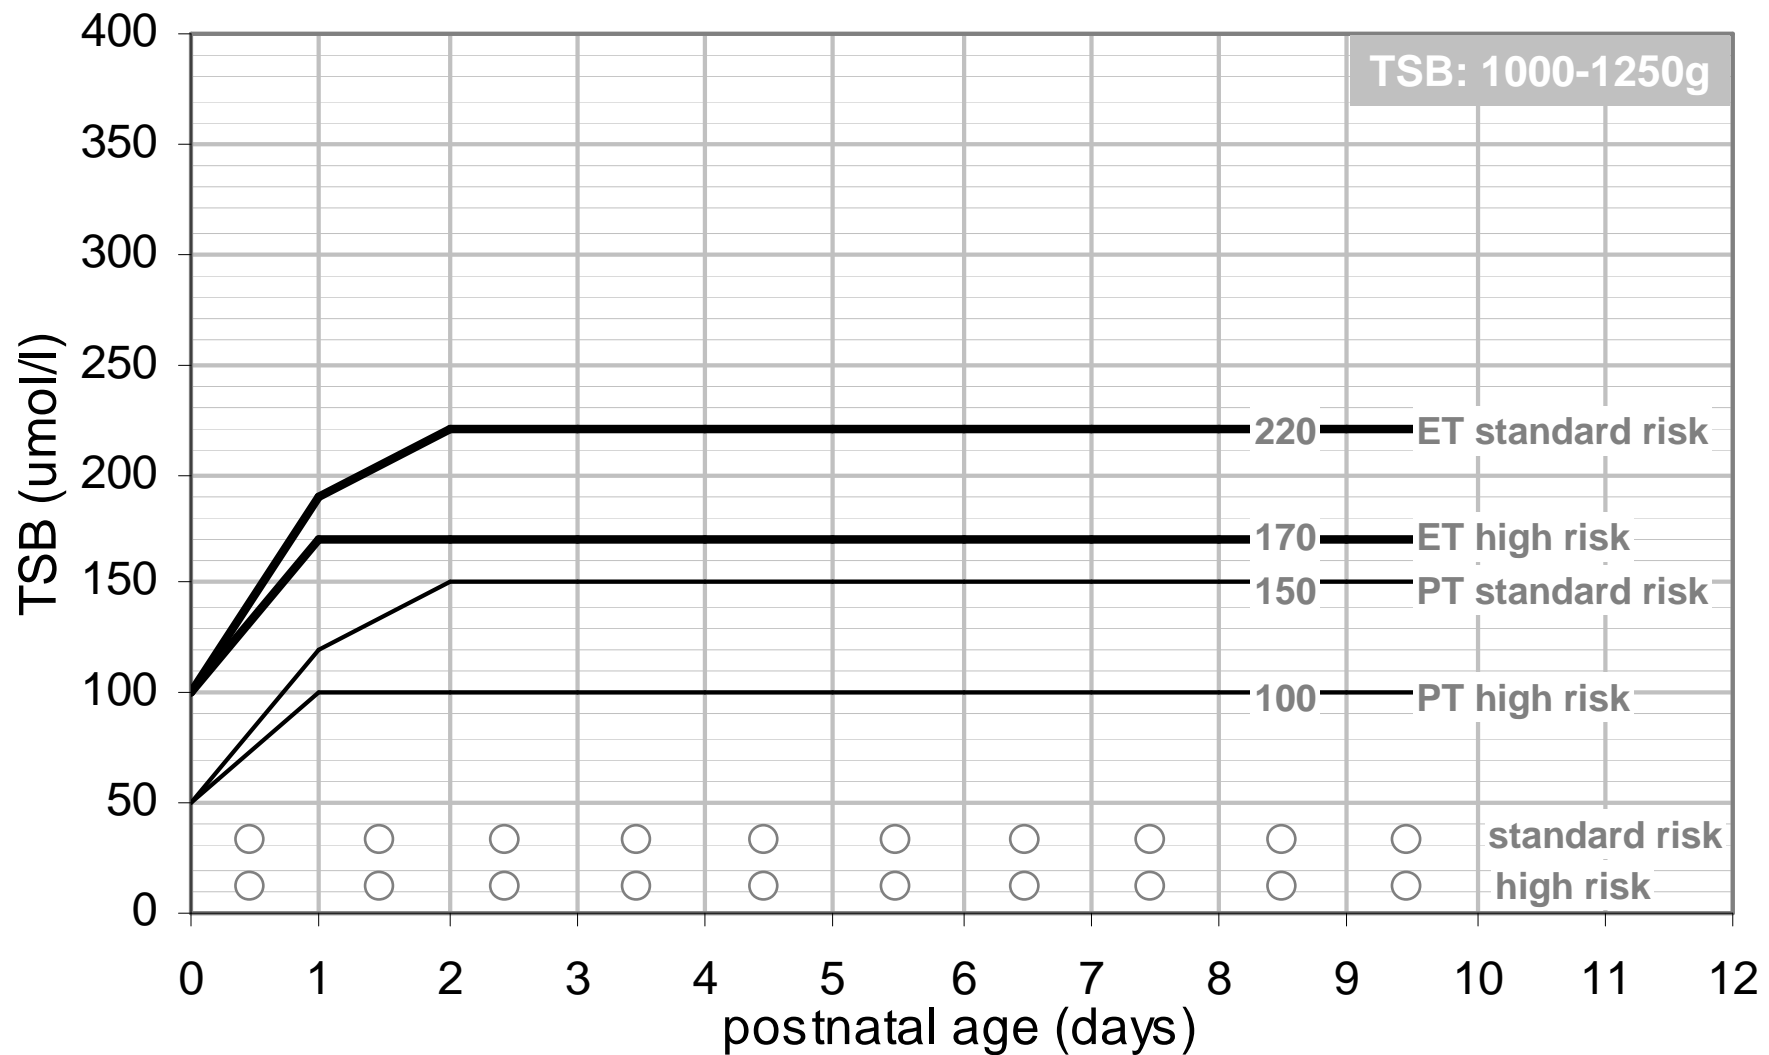

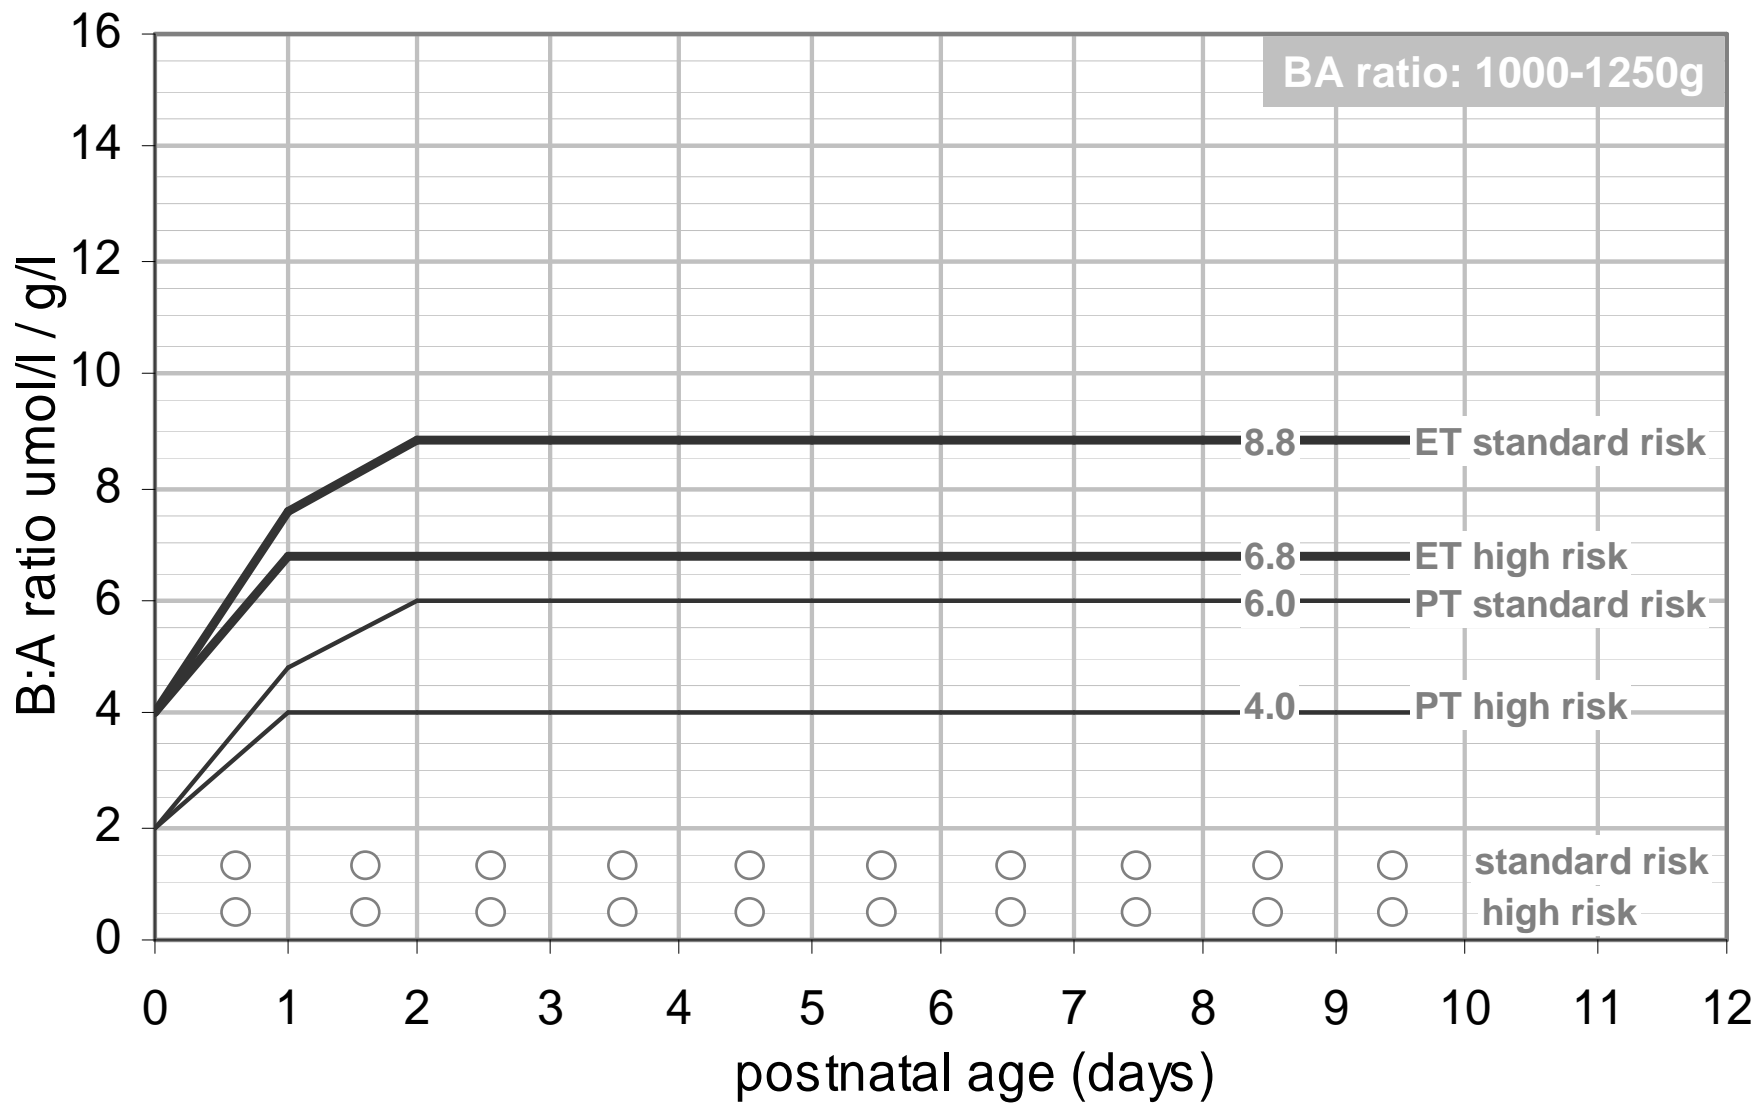

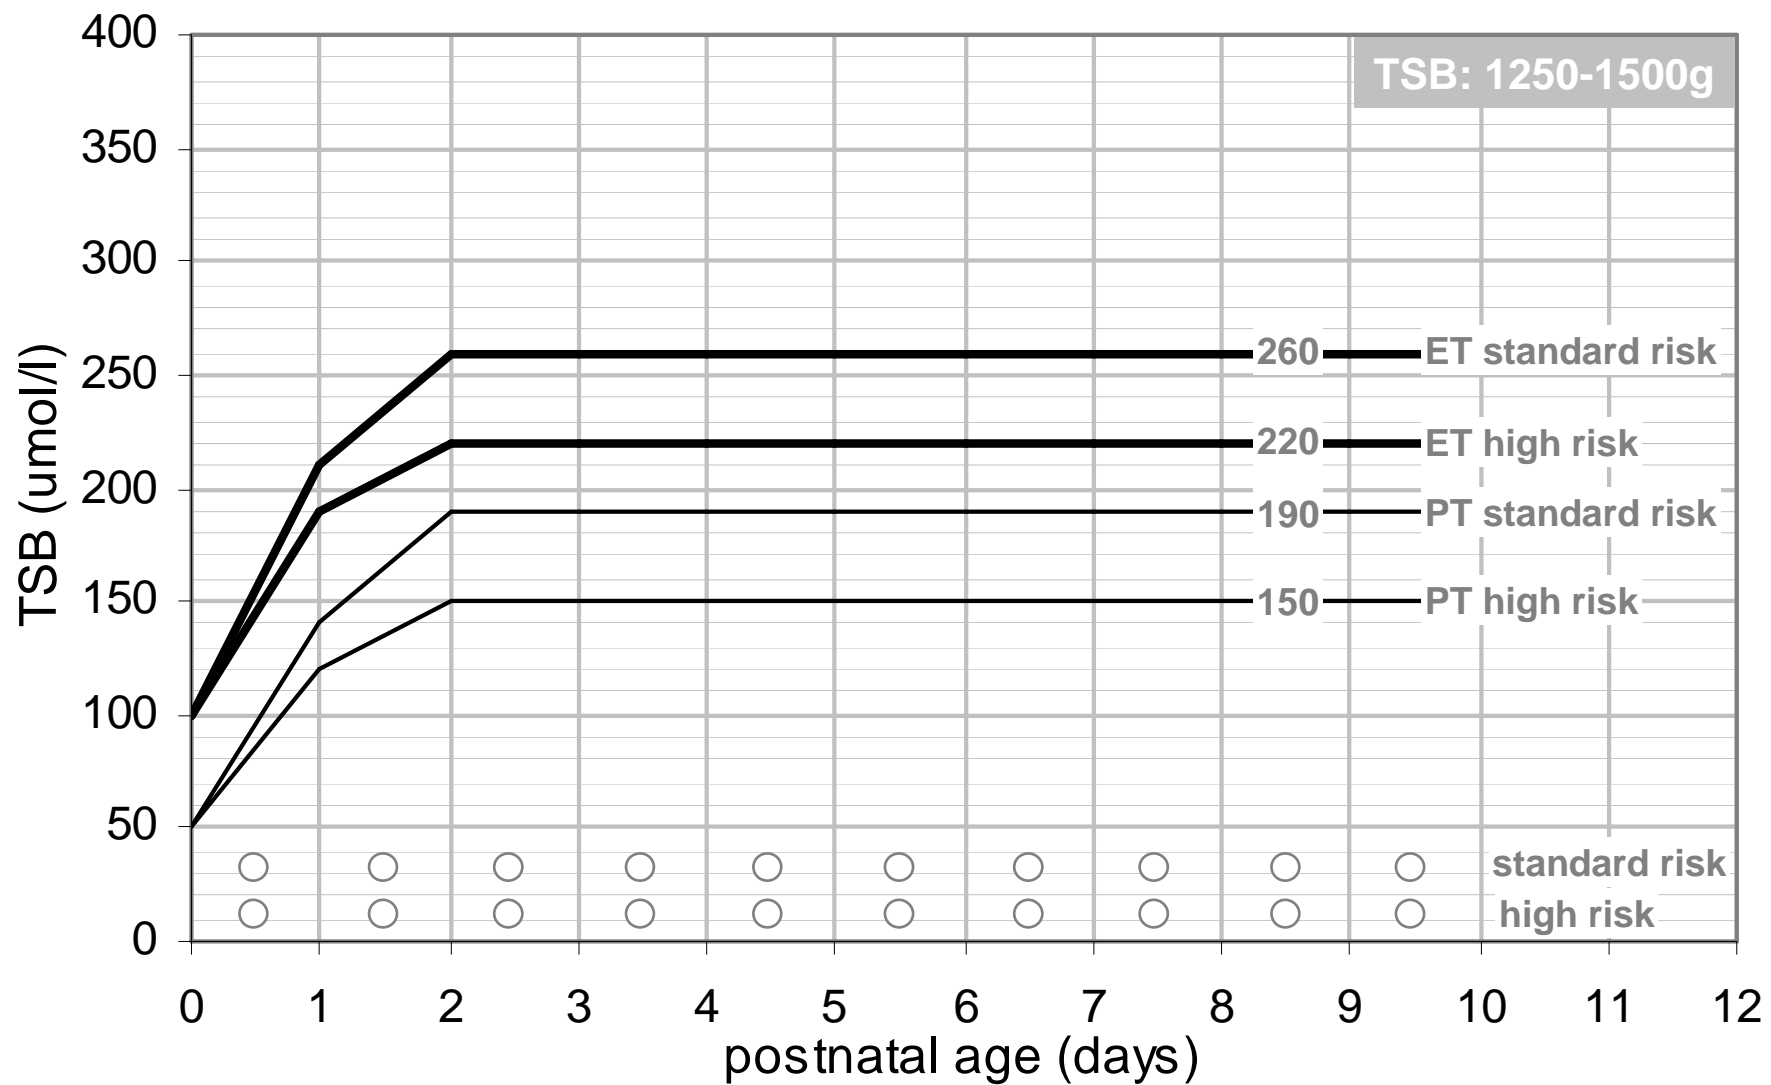

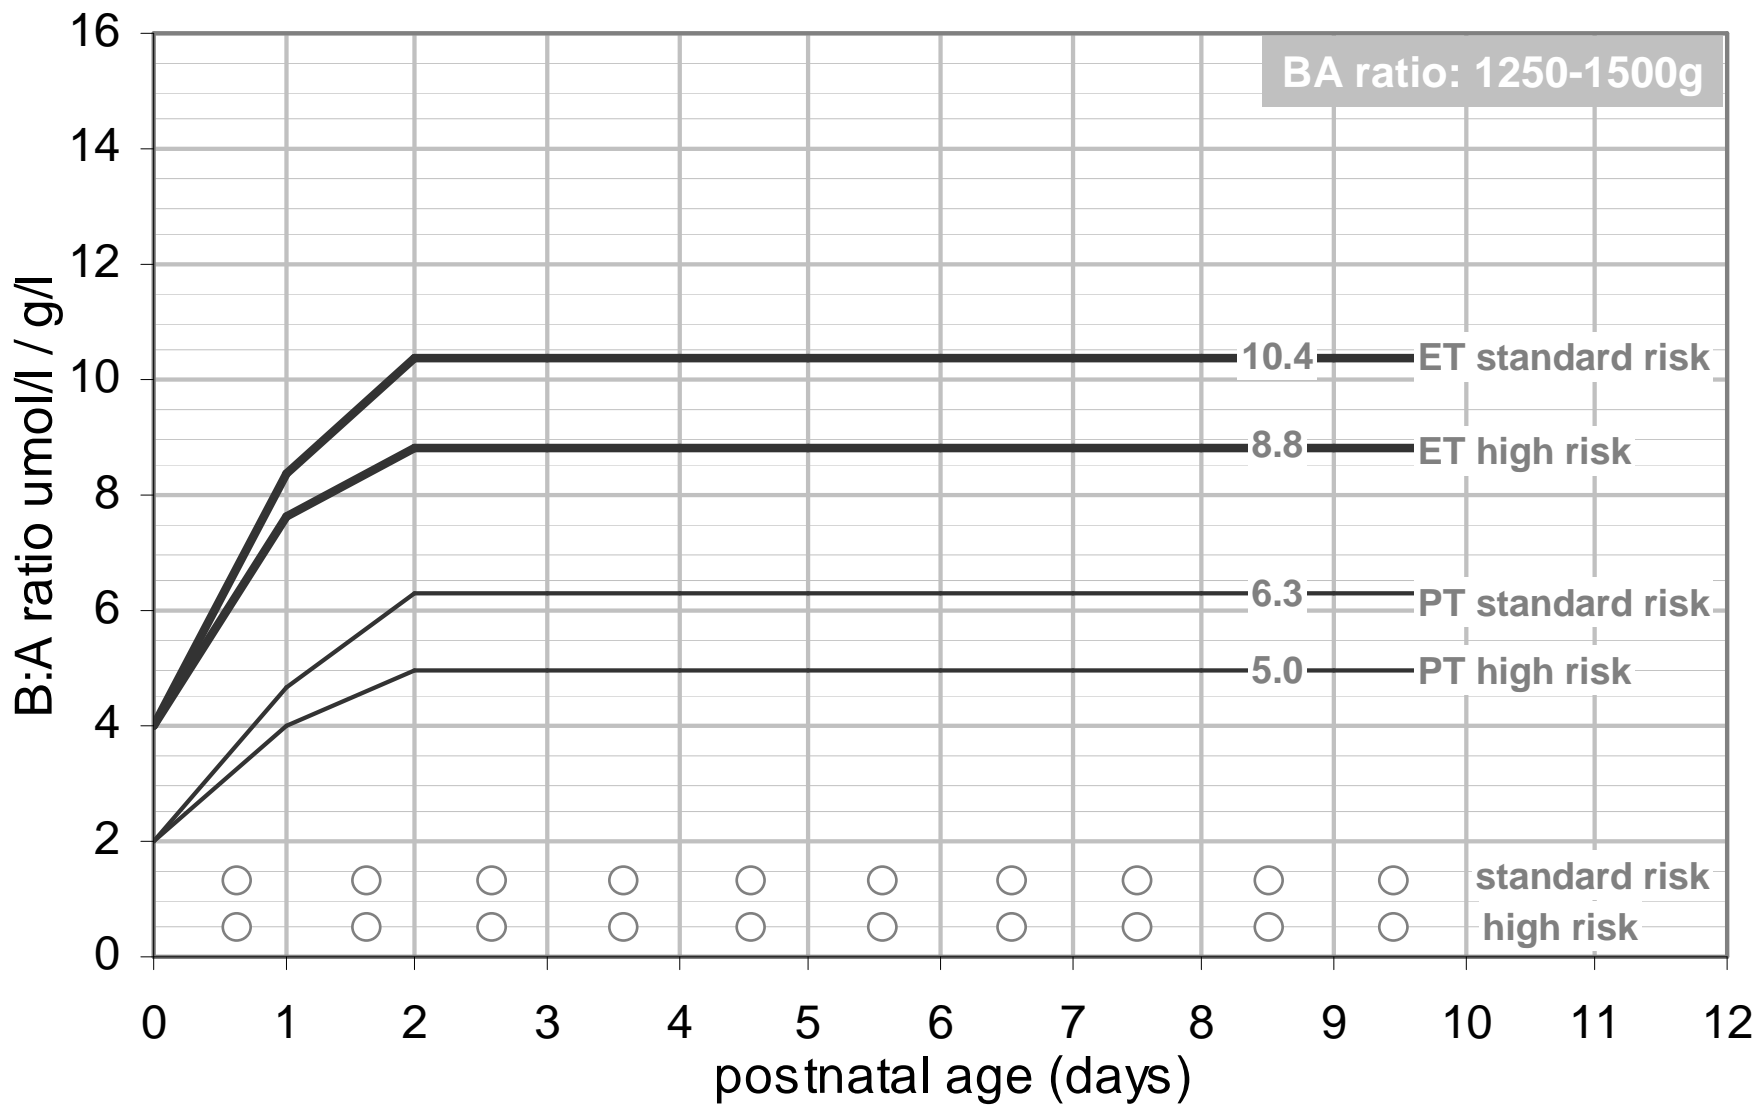

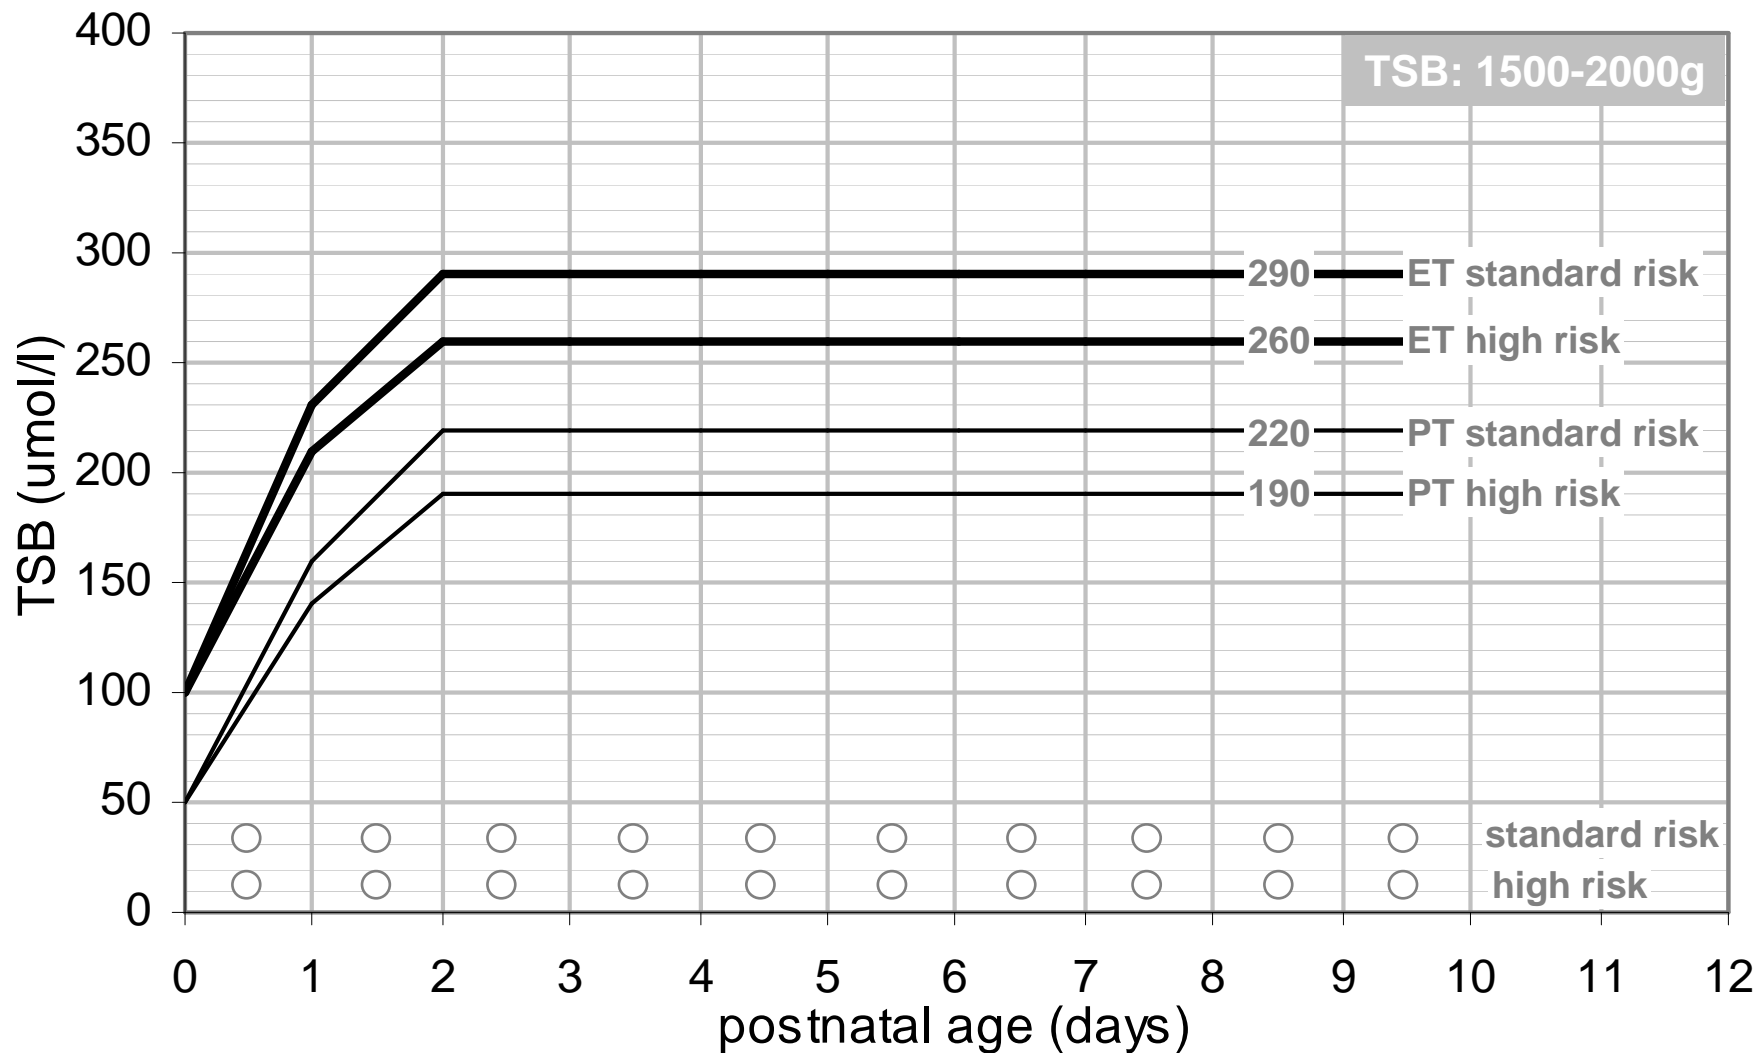



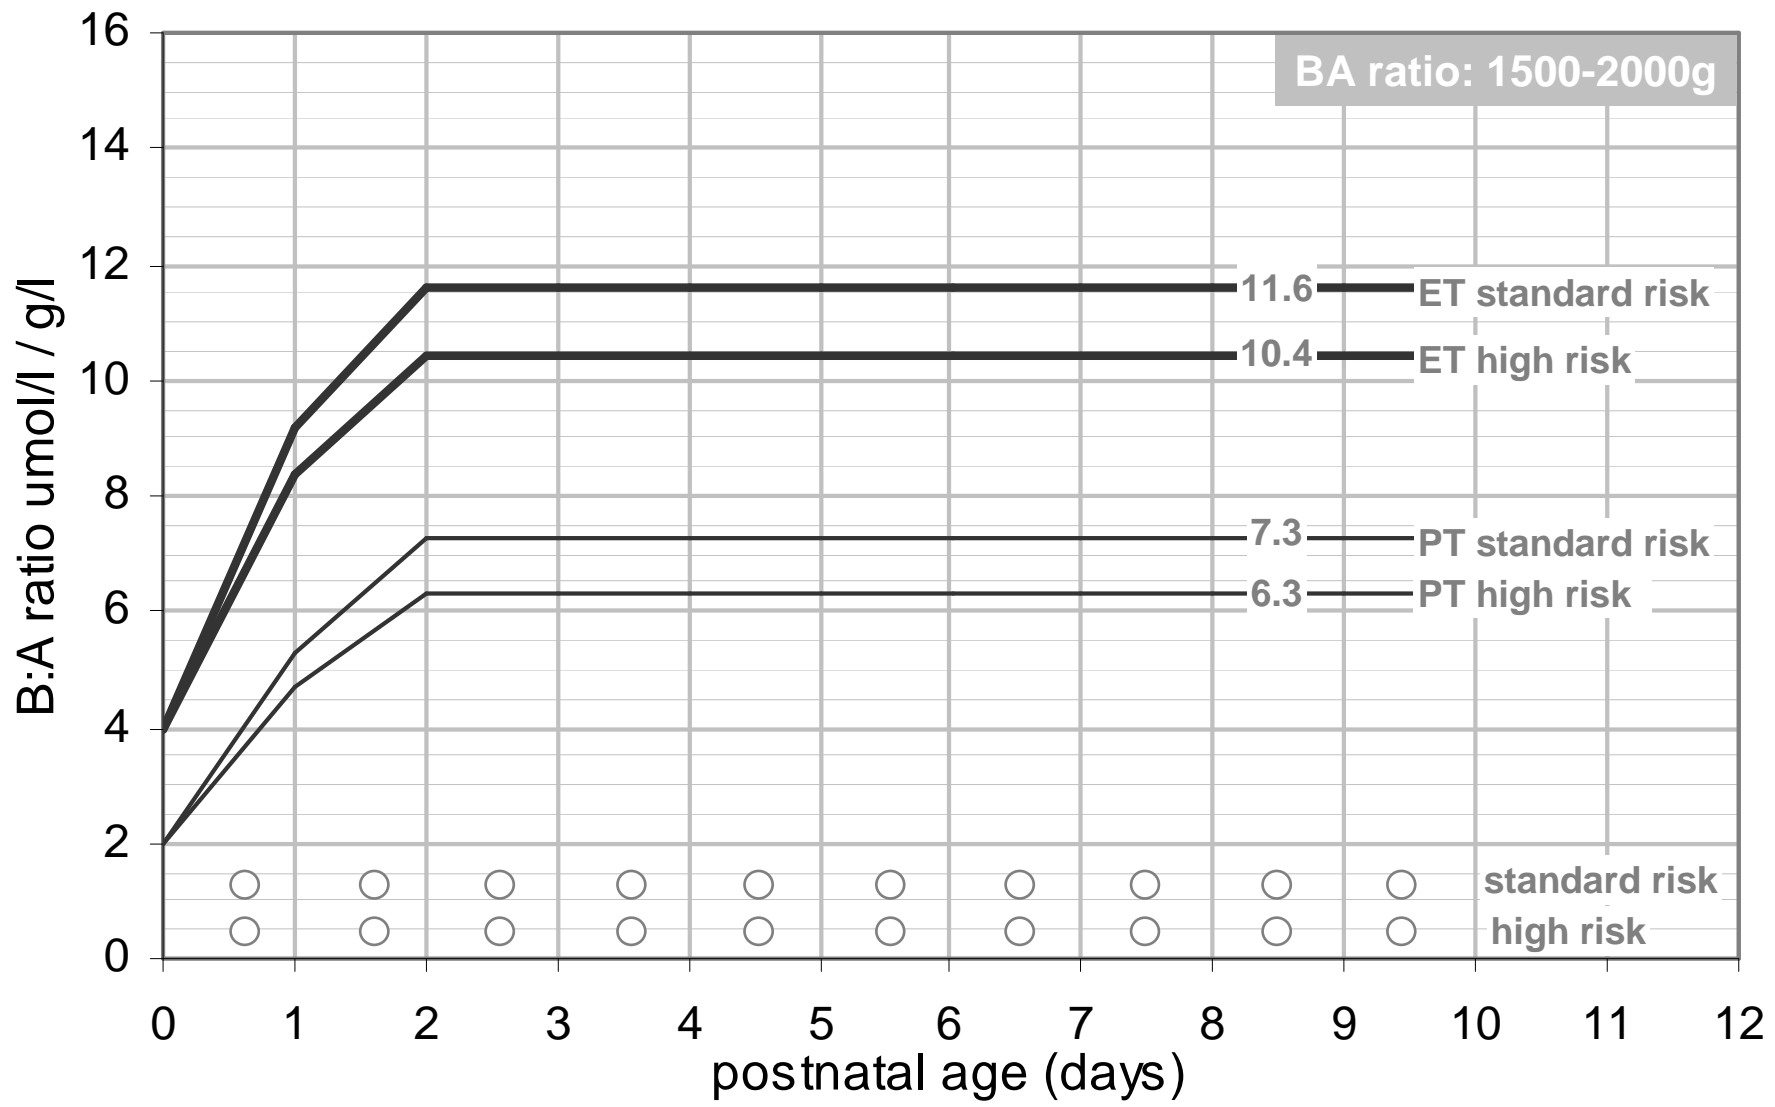

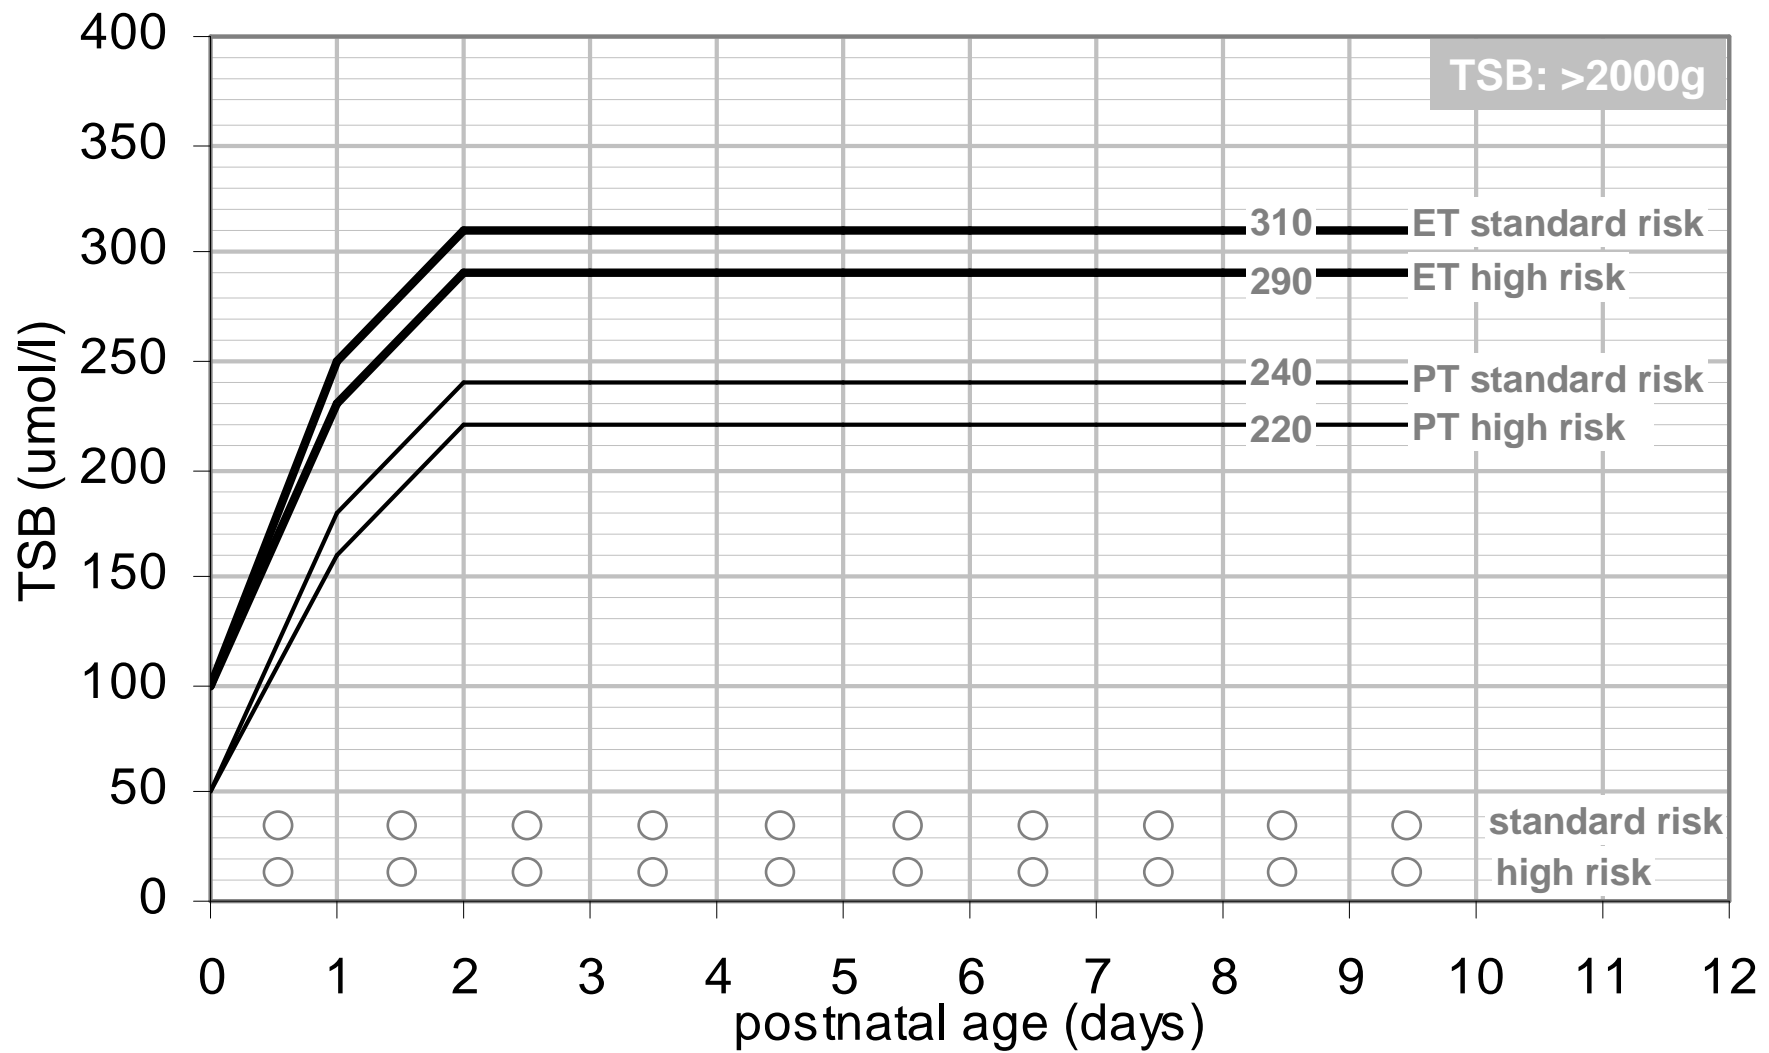

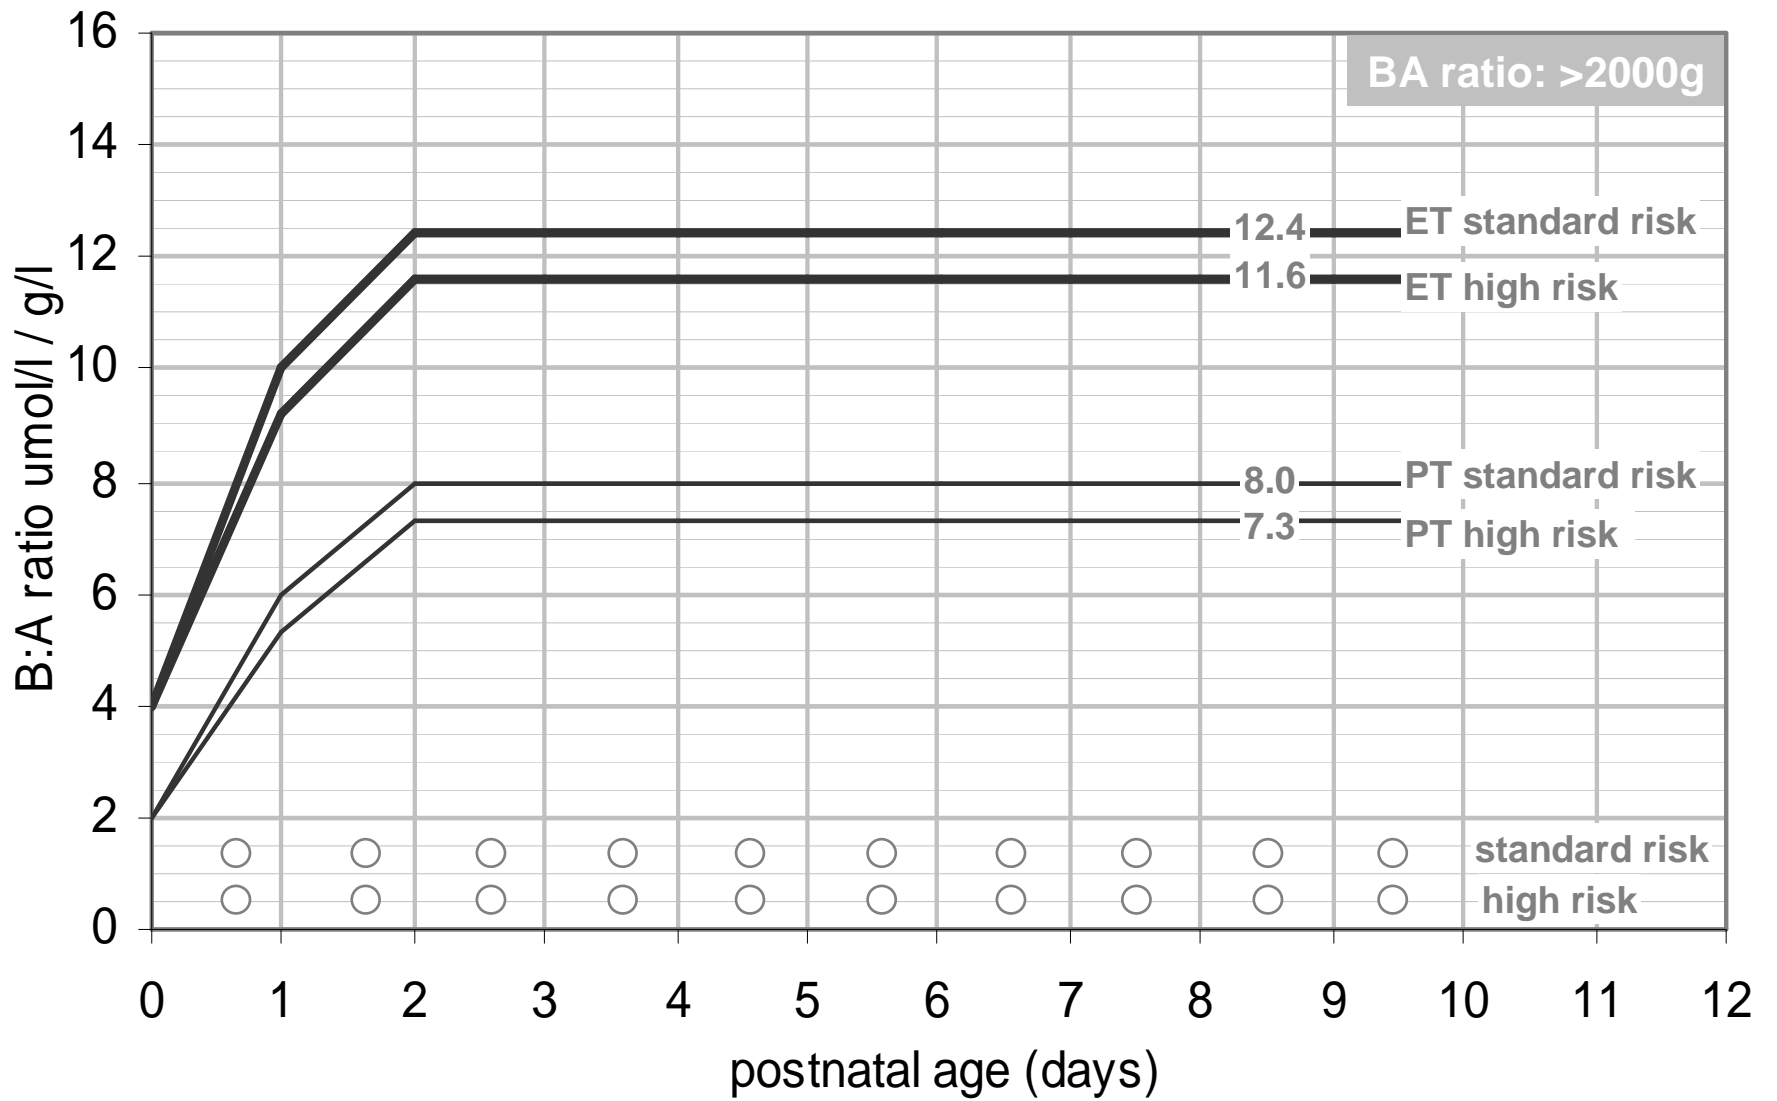

**Guideline for the use of TSB and BA ratio normograms for phototherapy (PT) and exchange transfusion (ET).** TSB in  $\mu\text{mol/L}$ , BA-ratio in  $\mu\text{mol/L} / \text{g/L} = \mu\text{mol/g}$ . TSB  $17.1 \mu\text{mol/L} = 1 \text{ mg/L}$

1. Select appropriate normograms based on birthweight
  2. Mark risk status (standard risk or high risk)
  3. Mark TSB and BA ratio in normograms
  4. Start phototherapy if TSB or BA is  $>$  PT-threshold  
Stop phototherapy if TSB and BA  $<$  PT-threshold
  5. Consider exchange transfusion if TSB or BA reaches ET threshold despite intensive PT
- High Risk** (check daily)
- asphyxia: Apgar score  $<$  3 at 5 min
  - hypoxemia:  $\text{PaO}_2 < 40 \text{ mmHg} (< 5.3 \text{ kPa}) > 2 \text{ hrs}$  (recent 24 hrs)
  - acidosis:  $\text{pH} < 7.15 > 1 \text{ hr}$  (recent 24 hrs)
  - hemolysis with positive Coombs
  - clinical of neurological deterioration (sepsis with use of vasopressors, meningitis, intracranial hemorrhage  $>$  gr 2)

*based on guidelines published by Ahlfors 1994 and Maisels 2003*

**Guideline for the use of TSB nomogram for phototherapy (PT) and exchange transfusion (ET).**

TSB in  $\mu\text{mol/L}$ .  $17.1 \mu\text{mol/L} = 1 \text{ mg/L}$

1. Select appropriate normogram based on birthweight
  2. Mark risk status (standard risk or high risk)
  3. Mark TSB in normogram
  4. Start phototherapy if TSB > PT-threshold  
Stop phototherapy if TSB < PT-threshold
  5. Consider exchange transfusion if ET-threshold is reached despite intensive PT
- High Risk** (check daily)
- asphyxia: Apgar score < 3 at 5 min
  - hypoxemia:  $\text{PaO}_2 < 40 \text{ mmHg} (< 5.3 \text{ kPa}) > 2 \text{ hrs}$  (recent 24 hrs)
  - acidosis:  $\text{pH} < 7.15 > 1 \text{ hr}$  (recent 24 hrs)
  - hemolysis with positive Coombs
  - clinical of neurological deterioration (sepsis with use of vasopressors, meningitis, intracranial hemorrhage > gr 2)

*based on guidelines published by Ahlfors 1994 and Maisels 2003*

**BA ratio GROUP  
birthweighthgroup  
< 1000 g**

name..... date of birth.....  
gestational age..... birthweight.....  
patientnumber..... studynumber.....

**BA ratio GROUP  
birthweighthgroup  
1000-1250 g**

name..... date of birth.....  
gestational age..... birthweight.....  
patientnumber..... studynumber.....

**BA ratio GROUP  
birthweighthgroup  
1250-1500 g**

name..... date of birth.....  
gestational age..... birthweight.....  
patientnumber..... studynumber.....

**BA ratio GROUP  
birthweighthgroup  
1500-2000 g**

name..... date of birth.....  
gestational age..... birthweight.....  
patientnumber..... studynumber.....

**BA ratio GROUP  
birthweighthgroup  
>2000 g**

name..... date of birth.....  
gestational age..... birthweight.....  
patientnumber..... studynumber.....

**TSB GROUP**  
**birthweighthgroup**  
**<1000 g**

name..... date of birth.....  
gestational age..... birthweight.....  
patiëntnumber..... studynumber.....

**TSB GROUP**  
**birthweighthgroup**  
**1000-1250 g**

name..... date of birth.....  
gestational age..... birthweight.....  
patiëntnumber..... studynumber.....

**TSB GROUP**  
**birthweighthgroup**  
**1250-1500 g**

name..... date of birth.....  
gestational age..... birthweight.....  
patiëntnumber..... studynumber.....

**TSB GROUP**  
**birthweighthgroup**  
**1500-2000 g**

name..... date of birth.....  
gestational age..... birthweight.....  
patiëntnumber..... studynumber.....

**TSB GROUP**  
**birthweighthgroup**  
**>2000 g**

name..... date of birth.....  
gestational age..... birthweight.....  
patiëntnumber..... studynumber.....

## **Guideline for the use of TSB and BA ratio nomograms for phototherapy (PT) and exchange transfusion (ET)**

TSB in  $\mu\text{mol/l}$  and albumin in  $\text{g/l}$  and B:A ratio in  $\mu\text{mol/l/g/l} = \mu\text{mol/g}$

1. Select appropriate nomogram based on birthweight
2. Mark risk status (standard risk of high risk)
3. Mark TSB and/or B:A ratio in nomogram
4. Start phototherapy if PT-threshold is reached  
Stop phototherapy if TSB is under PT-threshold
5. Consider exchange transfusion if ET-threshold is reached despite intensive PT

### **High risk** (check daily)

asphyxia: Apgar score  $< 3$  at 5 minutes

hypoxemia:  $\text{PaO}_2 < 40 \text{ mmHg}$  ( $< 5.3 \text{ kPa}$ )  $> 2 \text{ hrs}$  (recent 24 hrs)

acidosis:  $\text{pH} < 7.15$   $> 1 \text{ hr}$  (recent 24 hrs)

hemolysis with positive Coombs

clinical of neurological deterioration (sepsis with use of vasopressors, meningitis, intracranial hemorrhage  $> \text{gr } 2$ )

*based on guidelines published by Ahlfors 1994 and Maisels 2003*

*TSB:  $17.1 \mu\text{mol/l} = 1 \text{ mg/dl}$*
