# Supplementary material for: The Bilirubin Albumin Ratio in the Management of Hyperbilirubinemia in Preterm Infants to Improve Neurodevelopmental Outcome: A Randomized Controlled Trial – BARTrial
Source: PubMed Central journal article supplement (PMC4057208; doi:10.1371/journal.pone.0099466), 2014-06-13
Supplement: pone.0099466.s004.pdf [file pone.0099466.s004.pdf]

**Table S3. Characteristics of B/A ratio treated versus not treated infants.**

|                                   | <b>B/A ratio<br/>n=92</b> | <b>TSB<br/>n=77</b> | <b>P value</b> |
|-----------------------------------|---------------------------|---------------------|----------------|
| <b>Baseline characteristics</b>   |                           |                     |                |
| Birth weight (g)                  | 1258±364                  | 1232±313            | 0.62           |
| Gestational age (wks)             | 29±1.8                    | 29±1.8              | 0.81           |
| <b>Outcomes</b>                   |                           |                     |                |
| Mortality (n/N (%))               | 7/92 (7.6%)               | 13/77 (16.9%)       | 0.09           |
| Motor composite score             | 101±12                    | 103±12              | 0.51           |
| - Fine motor score                | 12±2                      | 12±3                | 0.32           |
| - Gross motor score               | 9±2                       | 9±2                 | 0.77           |
| Cognitive composite score         | 102±12                    | 102±10              | 0.82           |
| NDI severe (n/N (%))              | 4/81 (4.9%)               | 0/68                | 0.38           |
| NDI mild                          | 15/81 (18.5%)             | 11/68 (16.2%)       | 0.83           |
| NDI mild + severe                 | 19/81 (23%)               | 11/68 (16.2%)       | 0.42           |
| Death or severe NDI               | 11/81 (13.6%)             | 14/68 (21%)         | 0.28           |
| <b>TSB, B/A, and Phototherapy</b> |                           |                     |                |
| TSB max (µmol/L)                  | 174±42                    | 186±48              | 0.11           |
| TSB mean (µmol/L)                 | 121±36                    | 127±35              | 0.26           |
| B/A ratio max (µmol/g)            | 7.05±1.37                 | 7.72±1.83           | 0.01*          |
| B/A mean (µmol/g)                 | 4.88±1.09                 | 5.27±1.25           | 0.03*          |
| Alb trough (g/L)                  | 20.7±4.0                  | 20.2±4.3            | 0.36           |
| Alb mean (g/L)                    | 24.8± 4.3                 | 24.4±4.1            | 0.51           |
| PT duration (hrs)                 | 87±60                     | 77±55               | 0.29           |

Baseline characteristics, outcomes, and bilirubin-related course of infants who were treated at least once on the basis of their B/A ratio and not on the basis of TSB levels (n=92/306 (30%)) versus control infants who at least once had a B/A ratio that exceeded the B/A ratio threshold, but who were not treated accordingly (n=77/309(25%)).

Plus-minus values are means ± standard deviations. NDI is Neurodevelopmental impairment. Severe NDI is a composite motor score of <70 or a composite cognitive score of <70, moderate or severe cerebral palsy, severe bilateral hearing loss or bilateral blindness. Mild NDI is a composite motor score of <85 or a composite cognitive score of <85, any neurological impairment, any visual impairment, or any hearing impairment. PT is phototherapy. P values are the outcomes of either the *t* test or Fisher exact test. \* p<0.05. B/A ratio group: n=92, 7 died, 11 lost to follow-up. TSB group: n=77, 13 died, 9 lost to follow-up.
