# Supplementary material for: The Bilirubin Albumin Ratio in the Management of Hyperbilirubinemia in Preterm Infants to Improve Neurodevelopmental Outcome: A Randomized Controlled Trial – BARTrial
Source: PubMed Central journal article supplement (PMC4057208; doi:10.1371/journal.pone.0099466), 2014-06-13
Supplement: pone.0099466.s005.pdf [file pone.0099466.s005.pdf]

**Table S4. Bilirubin-related values of different subgroups**

| <b>Survivors versus non-survivors</b>                              | <b>group</b>                | <b>group</b>                            | <b>P</b> |
|--------------------------------------------------------------------|-----------------------------|-----------------------------------------|----------|
|                                                                    | <b>Survivors (n=572)</b>    | <b>Non-survivors (n=42)<sup>#</sup></b> |          |
| TSB max (μmol/L)                                                   | 181±44                      | 166±47                                  | 0.036*   |
| TSB mean (μmol/L)                                                  | 127±35                      | 111±35                                  | 0.005*   |
| B/A ratio max (μmol/g)                                             | 6.19±1.48                   | 6.91±2.38                               | 0.004*   |
| B/A mean (μmol/g)                                                  | 4.37±1.12                   | 4.65±1.56                               | 0.145    |
| Albumin trough (g/L)                                               | 25.8±4.9                    | 20.5±5.8                                | 0.000*   |
| Albumin mean (g/L)                                                 | 29.5± 4.5                   | 25.6±9.3                                | 0.011*   |
| PT duration (hrs)                                                  | 73±50                       | 84±53                                   | 0.228    |
| <b>Neurodevelopmentally non-impaired versus NDI survivors</b>      |                             |                                         |          |
|                                                                    | <b>Non-impaired (n=383)</b> | <b>NDI (n=107)</b>                      |          |
| TSB max (μmol/L)                                                   | 181±44                      | 182±45                                  | 0.88     |
| TSB mean (μmol/L)                                                  | 128±35                      | 129±35                                  | 0.67     |
| B/A ratio max (μmol/g)                                             | 6.16±1.44                   | 6.30±1.52                               | 0.38     |
| B/A mean (μmol/g)                                                  | 4.34±1.06                   | 4.50±1.13                               | 0.18     |
| Albumin trough (g/L)                                               | 26.1±5.1                    | 25.4±4.8                                | 0.19     |
| Albumin mean (g/L)                                                 | 29.7± 4.7                   | 29.1±4.5                                | 0.18     |
| PT duration (hrs)                                                  | 74±48                       | 80±60                                   | 0.25     |
| <b>Survivors with a composite motor scores ≥85 versus &lt;85</b>   |                             |                                         |          |
|                                                                    | <b>CMS ≥85 (n=480)</b>      | <b>CMS&lt;85 (n=21)</b>                 |          |
| TSB max (μmol/L)                                                   | 181±45                      | 170±39                                  | 0.29     |
| TSB mean (μmol/L)                                                  | 127±35                      | 122±28                                  | 0.59     |
| B/A ratio max (μmol/g)                                             | 6.20±1.47                   | 5.97±1.61                               | 0.48     |
| B/A mean (μmol/g)                                                  | 4.36±1.08                   | 4.34±1.02                               | 0.95     |
| Albumin trough (g/L)                                               | 25.8±5.1                    | 25.0±4.3                                | 0.50     |
| Albumin mean (g/L)                                                 | 29.5± 4.7                   | 29.0±4.11                               | 0.66     |
| PT duration (hrs)                                                  | 77±50                       | 85±86                                   | 0.56     |
| <b>Survivors with normal hearing versus any hearing impairment</b> |                             |                                         |          |
|                                                                    | <b>normal (n=464)</b>       | <b>any hearing impairment (n=19)</b>    |          |
| TSB max (μmol/L)                                                   | 181±43                      | 194±55                                  | 0.24     |
| TSB mean (μmol/L)                                                  | 128±34                      | 136±37                                  | 0.35     |
| B/A ratio max (μmol/g)                                             | 6.18±1.42                   | 6.79±2.11                               | 0.07     |
| B/A mean (μmol/g)                                                  | 4.37±1.06                   | 4.77±1.39                               | 0.12     |
| Albumin trough (g/L)                                               | 26±5                        | 26.4±9.98                               | 0.72     |
| Albumin mean (g/L)                                                 | 29.6± 4.6                   | 29.4±5.74                               | 0.85     |
| PT duration (hrs)                                                  | 75±52                       | 66±29                                   | 0.47     |

Plus-minus values are means ± standard deviations. CMS is composite motor score. PT is phototherapy. #: One patient's TSB values are missing; \*: Outcome of *t* test, two-tailed *p*<0.05
